# Supplementary material for: Hand Hygiene Behaviors in a Representative Sample of Polish Adolescents in Regions Stratified by COVID-19 Morbidity and by Confounding Variables (PLACE-19 Study): Is There Any Association?
Source: MDPI journal article supplement (doi:10.3390/pathogens9121011), 2020-12-01
Supplement: s1 [file s1]

**Table S1.** The declared handwashing procedure in the studied national sample of adolescents, in regions stratified by Gross Domestic Product (GDP) (comparison conducted while using chi<sup>2</sup> test).

| Characteristics                                    |                 | Low GDP in region | High GDP in region | <i>p</i> |
|----------------------------------------------------|-----------------|-------------------|--------------------|----------|
| <b>Folding sleeves</b>                             | Always          | 488 (51.0%)       | 133 (50.2%)        | 0.9768   |
|                                                    | Sometimes       | 194 (20.3%)       | 55 (20.8%)         |          |
|                                                    | Never           | 40 (4.2%)         | 11 (4.1%)          |          |
|                                                    | Not applicable* | 235 (24.5%)       | 66 (24.9%)         |          |
| <b>Removing watch and bracelets</b>                | Always          | 120 (12.5%)       | 40 (15.1%)         | 0.2716   |
|                                                    | Sometimes       | 176 (18.4%)       | 40 (15.1%)         |          |
|                                                    | Never           | 86 (9.0%)         | 27 (10.2%)         |          |
|                                                    | Not applicable* | 575 (60.1%)       | 158 (59.6%)        |          |
| <b>Removing rings before or during handwashing</b> | Always          | 96 (10.0%)        | 26 (9.8%)          | 0.5927   |
|                                                    | Sometimes       | 65 (6.8%)         | 16 (6.0%)          |          |
|                                                    | Never           | 72 (7.5%)         | 25 (9.4%)          |          |
|                                                    | Not applicable* | 724 (75.7%)       | 198 (74.8%)        |          |
| <b>Using soap</b>                                  | Always          | 897 (93.7%)       | 249 (94.0%)        | 0.5624   |
|                                                    | Sometimes       | 57 (6.0%)         | 14 (5.3%)          |          |
|                                                    | Never           | 3 (0.3%)          | 2 (0.7%)           |          |
| <b>Using warm water</b>                            | Always          | 595 (62.2%)       | 169 (63.8%)        | 0.8142   |
|                                                    | Sometimes       | 340 (35.5%)       | 89 (33.6%)         |          |
|                                                    | Never           | 22 (2.3%)         | 7 (2.6%)           |          |
| <b>Soaking hands before using soap</b>             | Always          | 695 (72.7%)       | 184 (69.4%)        | 0.5635   |
|                                                    | Sometimes       | 164 (17.1%)       | 48 (18.1%)         |          |
|                                                    | Never           | 97 (10.1%)        | 32 (12.1%)         |          |
|                                                    | Not applicable* | 1 (0.1%)          | 1 (0.4%)           |          |
| <b>Careful making soap lather on whole hands</b>   | Always          | 574 (60.0%)       | 162 (61.1%)        | 0.8130   |
|                                                    | Sometimes       | 341 (35.6%)       | 89 (33.6%)         |          |
|                                                    | Never           | 42 (4.4%)         | 13 (4.9%)          |          |
|                                                    | Not applicable* | 0 (0.0%)          | 1 (0.4%)           |          |
| <b>Turning the faucet off with hand</b>            | Always          | 490 (51.2%)       | 126 (47.6%)        | 0.2107   |
|                                                    | Sometimes       | 263 (27.5%)       | 69 (26.0%)         |          |
|                                                    | Never           | 204 (21.3%)       | 70 (26.4%)         |          |
| <b>Drying hands with towel</b>                     | Always          | 767 (80.2%)       | 222 (83.8%)        | 0.3033   |
|                                                    | Sometimes       | 163 (17.0%)       | 36 (13.6%)         |          |
|                                                    | Never           | 27 (2.8%)         | 7 (2.6%)           |          |

\*not included to statistical analysis

**Table S2.** The declared circumstances of washing hands, on the basis of the Handwashing Habits Questionnaire, in the studied national sample of adolescents, in regions stratified by COVID-19 morbidity, Gross Domestic Product (GDP) and the size of the town.

|                                   | Higher frequency of washing hands in regions of |          |                         |
|-----------------------------------|-------------------------------------------------|----------|-------------------------|
|                                   | COVID-19 morbidity                              | GDP      | Rural/urban environment |
| Before meals                      | Low morbidity                                   | -        | Rural                   |
| After meals                       | Low morbidity                                   | -        | Rural                   |
| Before preparing meals            | -                                               | -        | -                       |
| After preparing meals             | Low morbidity                                   | -        | -                       |
| Before using the restroom         | Low morbidity                                   | High GDP | Rural                   |
| After using the restroom          | Low morbidity                                   | -        | -                       |
| Before going to bed               | -                                               | -        | -                       |
| After waking up in the morning    | -                                               | -        | Rural                   |
| After combing their hair          | Low morbidity                                   | -        | Rural                   |
| After coming back home            | -                                               | -        | -                       |
| After using public transportation | -                                               | -        | -                       |
| After money exchange              | -                                               | -        | -                       |
| When hands are visibly soiled     | -                                               | -        | -                       |
| After handshaking                 | Low morbidity                                   | Low GDP  | Rural                   |
| After touching animals            | Low morbidity                                   | -        | Rural                   |
| After handling animal waste       | -                                               | -        | Rural                   |
| After handling animal food        | -                                               | -        | -                       |
| After contacting babies           | Low morbidity                                   | -        | -                       |
| After changing diapers            | -                                               | -        | -                       |
| After blowing nose                | Low morbidity                                   | -        | Rural                   |
| After sneezing                    | -                                               | -        | Rural                   |
| After coughing                    | -                                               | -        | Rural                   |
| Before touching sick people       | -                                               | -        | Rural                   |
| After touching sick people        | Low morbidity                                   | Low GDP  | -                       |
| After touching garbage            | -                                               | -        | -                       |
| After cleaning their home         | Low morbidity                                   | Low GDP  | -                       |
| After washing dishes              | -                                               | -        | -                       |
| After doing laundry               | -                                               | -        | -                       |

**Table S3.** The declared handwashing procedure in the studied national sample of adolescents, in regions stratified by COVID-19 morbidity, Gross Domestic Product (GDP) and the size of the town.

|                                             | Higher frequency of washing hands in regions of |     |                         |
|---------------------------------------------|-------------------------------------------------|-----|-------------------------|
|                                             | COVID-19 morbidity                              | GDP | Rural/urban environment |
| Folding sleeves                             | -                                               | -   | Rural                   |
| Removing watch and bracelets                | Low morbidity                                   | -   | Rural                   |
| Removing rings before or during handwashing | Low morbidity                                   | -   | -                       |
| Using soap                                  | -                                               | -   | -                       |
| Using warm water                            | -                                               | -   | -                       |
| Soaking hands before using soap             | -                                               | -   | -                       |
| Careful making soap lather on whole hands   | -                                               | -   | -                       |
| Turning the faucet off with hand            | -                                               | -   | -                       |
| Drying hands with towel                     | Low morbidity                                   | -   | -                       |
